# Supplementary material for: Patterns in Abundance, Cell Size and Pigment Content of Aerobic Anoxygenic Phototrophic Bacteria along Environmental Gradients in Northern Lakes
Source: PubMed Central journal article supplement (PMC4415779; doi:10.1371/journal.pone.0124035), 2015-04-30
Supplement: pone.0124035.s002.pdf [file pone.0124035.s002.pdf]

**S1 Table. Location and environmental characteristics for the lakes in the boreal (BOR) region.** Averages of environmental variables are presented for the summer of 2008. <sup>a</sup>Frequency of sampling. Secchi, secchi disk mean depth; DO, dissolved oxygen; DOC, dissolved organic carbon; TP, total phosphorous.

| Lake    | Region | Latitude & Longitude | Lake Area (km <sup>2</sup> ) | Water volume (×10 <sup>3</sup> m <sup>3</sup> ) | Max. depth (m) | Secchi (m) | Freq <sup>a</sup> | Summer 2008 epilimnetic data |        |                         |                          |                         |                                       |
|---------|--------|----------------------|------------------------------|-------------------------------------------------|----------------|------------|-------------------|------------------------------|--------|-------------------------|--------------------------|-------------------------|---------------------------------------|
|         |        |                      |                              |                                                 |                |            |                   | Water temp (°C)              | DO (%) | DO (mgL <sup>-1</sup> ) | DOC (mgL <sup>-1</sup> ) | TP (mgL <sup>-1</sup> ) | Chl <sub>a</sub> (µgL <sup>-1</sup> ) |
| Brendon | BOR    | 52°3'N<br>75°30'W    | 1.07                         | 3433                                            | 16.1           | 3.3        | 5                 | 19.0                         | 100    | 9.3                     | 5.63                     | 11.47                   | 2.62                                  |
| Clarkie | BOR    | 52°14'N<br>75°28'W   | 24.69                        | 616089                                          | 13.5           | 2.6        | 6                 | 19.0                         | 96.7   | 8.96                    | 6.84                     | 19.38                   | 2.34                                  |
| EM 320  | BOR    | 52°9'N<br>76°7'W     | 0.48                         | 846                                             | 5.6            | 2          | 4                 | 19.3                         | 97.1   | 8.96                    | 8.96                     | 9.3                     | 2.37                                  |
| L 12    | BOR    | 52°17'N<br>75°26'W   | nd                           | nd                                              | 5.7            | 3          | 1                 | 16.3                         | 91.2   | 8.92                    | 7.81                     | 7.13                    | 2.90                                  |
| L 40    | BOR    | 52°1'N<br>75°31'W    | 0.16                         | 662                                             | 10.3           | 3          | 6                 | 19.0                         | 99.9   | 9.26                    | 5.15                     | 8.56                    | 2.34                                  |
| L 48    | BOR    | 52°10'N<br>75°36'W   | nd                           | nd                                              | 7              | 2          | 1                 | 17.2                         | 94.9   | 9.14                    | 6.83                     | 6.27                    | 2.41                                  |
| L 56    | BOR    | 52°10'N<br>75°44'W   | nd                           | nd                                              | 5.8            | 2          | 1                 | 18.1                         | 88.7   | 8.37                    | 4.23                     | 11.50                   | 3.40                                  |
| L 9     | BOR    | 52°11'N<br>75°44'W   | nd                           | nd                                              | 3.8            | 2.3        | 1                 | 17.7                         | 91.0   | 8.67                    | 9.33                     | 8.12                    | 2.80                                  |
| L 11    | BOR    | 52°9'N<br>75°45'W    | 0.38                         | 485                                             | 5.3            | 1.6        | 5                 | 20.3                         | 98.6   | 8.93                    | 10.30                    | 13.2                    | 1.59                                  |
| L 2     | BOR    | 52°7'N<br>75°49'W    | 0.043                        | 51                                              | 1.2            | 1.3        | 4                 | 18.0                         | 99.8   | 9.45                    | 9.49                     | 12.37                   | 2.43                                  |
| L 34    | BOR    | 51°58'N<br>75°46'W   | 0.46                         | 1861                                            | 9.8            | 1.8        | 4                 | 18.9                         | 97.7   | 9.08                    | 9.70                     | 31.09                   | 2.34                                  |
| L 60    | BOR    | 52°13'N<br>75°45'W   | 1.38                         | 7282                                            | 13.5           | 2.75       | 4                 | 19.0                         | 100    | 9.22                    | 5.93                     | 4.40                    | 1.84                                  |
| L 66    | BOR    | 51°57'N<br>76°0'W    | 0.072                        | 267                                             | 10             | 1.8        | 3                 | 18.6                         | 97.6   | 9.13                    | 8.86                     | 12.72                   | 2.05                                  |
| L 8     | BOR    | 52°7'N<br>75°43'W    | 0.32                         | 703                                             | 9.7            | 2.4        | 4                 | 19.3                         | 99.8   | 9.1                     | 9.50                     | 8.01                    | 2.43                                  |
| Laby    | BOR    | 52°13'N<br>75°42'W   | 2.57                         | 3515                                            | 18             | 2.25       | 5                 | 19.4                         | 97.9   | 9.0                     | 10.18                    | 6.09                    | 1.91                                  |
| Mitsu   | BOR    | 52°9'N<br>76°9'W     | 3.97                         | 6858                                            | 8.6            | 2.6        | 4                 | 18.2                         | 98.2   | 9.26                    | 7.16                     | 12.17                   | 1.95                                  |
| Natel   | BOR    | 52°10'N              | 3.87                         | 17596                                           | 13.1           | 2.3        | 5                 | 19.1                         | 98.9   | 9.17                    | 7.29                     | 7.73                    | 2.02                                  |
