# Supplementary material for: Patterns in Abundance, Cell Size and Pigment Content of Aerobic Anoxygenic Phototrophic Bacteria along Environmental Gradients in Northern Lakes
Source: PubMed Central journal article supplement (PMC4415779; doi:10.1371/journal.pone.0124035), 2015-04-30
Supplement: pone.0124035.s003.pdf [file pone.0124035.s003.pdf]

**S2 Table. Location and environmental characteristics for the lakes in the eastern townships (EST) region.** Averages of environmental variables are presented for the summer of 2008. <sup>a</sup>Frequency of sampling. Secchi, secchi disk mean depth; DO, dissolved oxygen; DOC, dissolved organic carbon; TP, total phosphorous.

| Lake         | Region | Latitude & Longitude | Lake Area (km <sup>2</sup> ) | Water volume (×10 <sup>3</sup> m <sup>3</sup> ) | Max. depth (m) | Secchi (m) | Freq <sup>a</sup> | Summer 2008 epilimnetic data |        |                         |                          |                         |                           |
|--------------|--------|----------------------|------------------------------|-------------------------------------------------|----------------|------------|-------------------|------------------------------|--------|-------------------------|--------------------------|-------------------------|---------------------------|
|              |        |                      |                              |                                                 |                |            |                   | Water temp (°C)              | DO (%) | DO (mgL <sup>-1</sup> ) | DOC (mgL <sup>-1</sup> ) | TP (mgL <sup>-1</sup> ) | Chla (µgL <sup>-1</sup> ) |
| Argent       | EST    | 45°18'N<br>72°19'W   | 2.91                         | 4411                                            | 8.5            | 2.4        | 1                 | 20.6                         | 88.6   | 7.97                    | 10.41                    | 14.75                   | 1.83                      |
| Bowker       | EST    | 45°24'N<br>72°14'W   | 2.48                         | 60499                                           | 36.5           | 8          | 16                | 21.7                         | 101    | 8.94                    | 2.31                     | 3.56                    | 0.79                      |
| Brompton     | EST    | 45°28'N<br>72°7'W    | 22.63                        | 113211                                          | 25             | 2.3        | 1                 | 22.1                         | 104    | 9.13                    | 6.03                     | 10.37                   | 4.99                      |
| Bran de Scie | EST    | 45°24'N<br>72°12'W   | nd                           | nd                                              | 8.5            | 1.9        | 13                | 23.1                         | 105    | 9.03                    | 6.44                     | 16.43                   | 11.66                     |
| Brome        | EST    | 45°16'N<br>72°30'W   | 15.60                        | 78150                                           | 10.09          | 2          | 1                 | 21.5                         | 105    | 9.32                    | 9.48                     | 22.22                   | 7.43                      |
| Fraser       | EST    | 45°22'N<br>72°10'W   | 9.34                         | 13390                                           | 11.9           | 2.2        | 1                 | 19.9                         | 91.9   | 8.37                    | 5.51                     | 7.86                    | 2.75                      |
| Orford       | EST    | 45°17'N<br>72°16'W   | 1.32                         | 21467                                           | 31.5           | 4.4        | 1                 | 21.1                         | 102    | 9.14                    | 3.68                     | 4.26                    | 1.67                      |
| Parker       | EST    | 45°20'N<br>72°18'W   | nd                           | nd                                              | 8.5            | 1.4        | 1                 | 20.0                         | 89.8   | 8.17                    | 12.78                    | 26.23                   | 3.50                      |
| Roxton       | EST    | 45°28'N<br>72°39'W   | 0.42                         | nd                                              | 4.8            | 1.5        | 1                 | 21.9                         | 93.2   | 8.16                    | 12.11                    | 40.31                   | 14.24                     |
| Simoneau     | EST    | 45°24'N<br>72°11'W   | nd                           | nd                                              | 22.2           | 3          | 1                 | 20.7                         | 83.1   | 7.48                    | 5.21                     | 5.03                    | 1.77                      |
| Stuckley     | EST    | 45°22'N<br>72°15'W   | 1.03                         | 50789                                           | 23.5           | 3.5        | 1                 | 20.1                         | 92.7   | 8.42                    | 7.07                     | 6.38                    | 3.54                      |
| Tomcod       | EST    | 45°3'N<br>72°2'W     | 0.83                         | 1355                                            | 2.7            | 0.25       | 1                 | 19.1                         | 47.6   | 4.37                    | 10.90                    | 177.20                  | 55.34                     |
| Waterloo     | EST    | 45°21'N<br>72°30'W   | 1.61                         | 3766                                            | 4.5            | 0.9        | 1                 | 20.5                         | 105    | 9.75                    | 12.22                    | 38.06                   | 20.04                     |
