# Supplementary material for: Patterns in Abundance, Cell Size and Pigment Content of Aerobic Anoxygenic Phototrophic Bacteria along Environmental Gradients in Northern Lakes
Source: PubMed Central journal article supplement (PMC4415779; doi:10.1371/journal.pone.0124035), 2015-04-30
Supplement: pone.0124035.s004.pdf [file pone.0124035.s004.pdf]

**S3 Table. Location and environmental characteristics for the lakes in the laurentians (LAU) region.** Averages of environmental variables are presented for the summer of 2008. <sup>a</sup>Frequency of sampling. Secchi, secchi disk mean depth; DO, dissolved oxygen; DOC, dissolved organic carbon; TP, total phosphorous.

| Lake        | Region | Latitude & Longitude | Lake Area (km <sup>2</sup> ) | Water volume (×10 <sup>3</sup> m <sup>3</sup> ) | Max. depth (m) | Secchi (m) | Freq <sup>a</sup> | Summer 2008 epilimnetic data |        |                         |                          |                         |                           |
|-------------|--------|----------------------|------------------------------|-------------------------------------------------|----------------|------------|-------------------|------------------------------|--------|-------------------------|--------------------------|-------------------------|---------------------------|
|             |        |                      |                              |                                                 |                |            |                   | Water temp (°C)              | DO (%) | DO (mgL <sup>-1</sup> ) | DOC (mgL <sup>-1</sup> ) | TP (mgL <sup>-1</sup> ) | Chla (µgL <sup>-1</sup> ) |
| Connelly    | LAU    | 45°53'N<br>73°57'W   | 1.25                         | 9211                                            | 23             | 3.5        | 13                | 23.0                         | 117    | 10.48                   | 4.34                     | 10.20                   | 3.73                      |
| Cornu       | LAU    | 45°58'N<br>74°23'W   | nd                           | nd                                              | 13.1           | 4.1        | 1                 | 23.6                         | 123    | 10.51                   | 3.74                     | 6.94                    | 1.11                      |
| Croche      | LAU    | 45°59'N<br>74°0'W    | 0.18                         | 838                                             | 9.8            | 4          | 12                | 22.8                         | 98.7   | 8.39                    | 4.45                     | 5.59                    | 3.21                      |
| Cryystal    | LAU    | 45°58'N<br>73°53'W   | 0.29                         | 2820                                            | 19.2           | 7.1        | 1                 | 22.6                         | 99.4   | 8.6                     | 2.60                     | 4.53                    | 1.21                      |
| Duffy       | LAU    | 46°09'N<br>73°55'W   | nd                           | nd                                              | 1.1            | 1.1        | 1                 | 24.9                         | 92.0   | 7.75                    | 7.45                     | 10.55                   | 2.65                      |
| Dupuis      | LAU    | 46°4'N<br>73°52'W    | nd                           | nd                                              | 45.4           | 3.3        | 1                 | 22.4                         | 101    | 8.83                    | 5.17                     | 6.09                    | 2.28                      |
| Echo        | LAU    | 45°53'N<br>74°1'W    | nd                           | nd                                              | 2.1            | 2.1        | 1                 | 25.0                         | 126    | 10.45                   | 5.26                     | 15.29                   | 3.54                      |
| En Coeur    | LAU    | 45°58'N<br>74°0'W    | 0.43                         | 1284                                            | 8              | 3.6        | 1                 | 21.9                         | 105    | 9.25                    | 4.58                     | 8.57                    | 4.62                      |
| Fournelle   | LAU    | 45°54'N<br>74°2'W    | 0.18                         | 485                                             | 7.2            | 4.3        | 1                 | 23.5                         | 118    | 10.06                   | 4.02                     | 9.13                    | 1.42                      |
| Lac du Nord | LAU    | 45°48'N<br>74°7'W    | nd                           | nd                                              | 7.8            | 2.75       | 1                 | 21.1                         | 105    | 9.33                    | 6.13                     | 31.16                   | 4.19                      |
| Morency     | LAU    | 45°55'N<br>74°2'W    | 0.25                         | 2223                                            | 8.5            | 4.85       | 1                 | 22.6                         | 114    | 9.92                    | 3.45                     | 7.65                    | 1.89                      |
| Pin Rouge   | LAU    | 45°57'N<br>74°2'W    | 0.13                         | 670                                             | 6.9            | 1.9        | 1                 | 21.6                         | 113    | 9.96                    | 7.96                     | 12.60                   | 2.49                      |
| Rond        | LAU    | 45°58'N<br>74°2'W    | 0.094                        | 428                                             | 10.5           | 3          | 1                 | 23.5                         | 92.8   | 7.85                    | 4.79                     | 10.69                   | 2.81                      |
