# Supplementary material for: Patterns in Abundance, Cell Size and Pigment Content of Aerobic Anoxygenic Phototrophic Bacteria along Environmental Gradients in Northern Lakes
Source: PubMed Central journal article supplement (PMC4415779; doi:10.1371/journal.pone.0124035), 2015-04-30
Supplement: pone.0124035.s005.pdf [file pone.0124035.s005.pdf]

**S4 Table. Total bacterial abundance and the contribution of AAP bacteria to total bacterial abundance (%AAP) in the three broad seasonal categories: summer (stratification period), winter (ice cover period) and a mixed period. Average values are presented for each one of the 43 lakes sampled.**

| Lake         | Region | Summer  |                                                       | Winter  |                                                       | Mix     |                                                       |
|--------------|--------|---------|-------------------------------------------------------|---------|-------------------------------------------------------|---------|-------------------------------------------------------|
|              |        | AAP (%) | Total bacteria ( $\times 10^5$ cellmL <sup>-1</sup> ) | AAP (%) | Total bacteria ( $\times 10^5$ cellmL <sup>-1</sup> ) | AAP (%) | Total bacteria ( $\times 10^5$ cellmL <sup>-1</sup> ) |
| Brendon      | BOR    | 5.5     | 34.3                                                  | 4.38    | 42.4                                                  | -       |                                                       |
| Clarky       | BOR    | 5.0     | 13.9                                                  | 3.57    | 29.9                                                  | 9.38    | 20.4                                                  |
| EM 320       | BOR    | 8.9     | 21.5                                                  | -       | -                                                     | -       | -                                                     |
| L 12         | BOR    | 9.0     | 17.9                                                  | -       | -                                                     | -       | -                                                     |
| L 40         | BOR    | 7.7     | 26.2                                                  | 2.17    | 73.3                                                  | -       | -                                                     |
| L 48         | BOR    | 3.9     | 6.05                                                  | -       | -                                                     | -       | -                                                     |
| L 56         | BOR    | 7.8     | 12.2                                                  | -       | -                                                     | -       | -                                                     |
| L 9          | BOR    | 5.7     | 9.81                                                  | -       | -                                                     | -       | -                                                     |
| L 11         | BOR    | 11.5    | 39.1                                                  | 4.12    | 38.6                                                  | -       | -                                                     |
| L 2          | BOR    | 9.5     | 37.3                                                  | 1.62    | 38.9                                                  | 4.00    | 16.0                                                  |
| L 34         | BOR    | 6.0     | 26.2                                                  | -       | -                                                     | -       | -                                                     |
| L 60         | BOR    | 6.0     | 17.8                                                  | 3.91    | 26.0                                                  | -       | -                                                     |
| L 66         | BOR    | 11.3    | 17.8                                                  | -       | -                                                     | -       | -                                                     |
| L 8          | BOR    | 6.1     | 31.7                                                  | -       | -                                                     | -       | -                                                     |
| Laby         | BOR    | 7.9     | 14.3                                                  | 1.48    | 27.6                                                  | -       | -                                                     |
| Mitsu        | BOR    | 9.8     | 34.1                                                  | 1.67    | 73.7                                                  | -       | -                                                     |
| Natel        | BOR    | 7.1     | 15.2                                                  | 3.2     | 48.0                                                  | -       | -                                                     |
| Argent       | EST    | 16.1    | 20.0                                                  | -       | -                                                     | -       | -                                                     |
| Bowker       | EST    | 4.9     | 13.2                                                  | 3.64    | 26.3                                                  | 3.49    | 20.1                                                  |
| Brompton     | EST    | 6.6     | 28.3                                                  | -       | -                                                     | -       | -                                                     |
| Bran de Scie | EST    | 9.7     | 26.1                                                  | 2.00    | 39.4                                                  | 1.94    | 28.2                                                  |
| Brome        | EST    | 5.3     | 10.7                                                  | -       | -                                                     | -       | -                                                     |
| Fraser       | EST    | 4.5     | 32.0                                                  | -       | -                                                     | -       | -                                                     |
| Orford       | EST    | 4.1     | 14.6                                                  | -       | -                                                     | -       | -                                                     |
| Parker       | EST    | 8.6     | 12.4                                                  | -       | -                                                     | -       | -                                                     |
| Roxton       | EST    | 7.4     | 29.7                                                  | -       | -                                                     | -       | -                                                     |
| Simoneau     | EST    | 5.8     | 19.7                                                  | -       | -                                                     | -       | -                                                     |
| Stuckley     | EST    | 3.2     | 3.80                                                  | -       | -                                                     | -       | -                                                     |
| Tomcod       | EST    | 8.3     | 66.4                                                  | -       | -                                                     | -       | -                                                     |
| Waterloo     | EST    | 2.2     | 47.3                                                  | -       | -                                                     | -       | -                                                     |
| Connelly     | LAU    | 2.1     | 32.7                                                  | 0.06    | 19.1                                                  | 10.0    | 27.2                                                  |
| Cornu        | LAU    | 3.3     | 25.0                                                  | -       | -                                                     | -       | -                                                     |
| Croche       | LAU    | 1.8     | 16.0                                                  | 4.43    | 11.9                                                  | 8.66    | 18.2                                                  |
| Cryystal     | LAU    | 4.6     | 14.8                                                  | -       | -                                                     | -       | -                                                     |
| Duffy        | LAU    | 1.8     | 31.5                                                  | -       | -                                                     | -       | -                                                     |
| Dupuis       | LAU    | 6.1     | 24.3                                                  | -       | -                                                     | -       | -                                                     |
| Echo         | LAU    | 8.3     | 43.9                                                  | -       | -                                                     | -       | -                                                     |
| En Coeur     | LAU    | 5.0     | 21.3                                                  | -       | -                                                     | -       | -                                                     |
| Fournelle    | LAU    | 4.8     | 17.5                                                  | -       | -                                                     | -       | -                                                     |
| Lac du Nord  |        | 3.5     | 19.1                                                  | -       | -                                                     | -       | -                                                     |
| Morency      | LAU    | 6.0     | 36.5                                                  | -       | -                                                     | -       | -                                                     |
| Pin Rouge    | LAU    | 7.1     | 25.2                                                  | -       | -                                                     | -       | -                                                     |
| Rond         | LAU    | 3.3     | 25.1                                                  | -       | -                                                     | -       | -                                                     |
